# Supplementary material
Source: publisher site journal article supplement (https://www.spandidos-publications.com/6057/downloadSupplementary)

Figure S1. PPI network of carbohydrate-associated differentially expressed genes was visualized by Cytoscape. The interaction network of proteins was measured by the STRING database under the condition of high confidence score (0.700), which included 201 nodes and 1,132 edges with a PPI enriched P-value  $<1.0 \times 10^{-16}$ . The color from red to yellow represented the degree ranked from high to low. PPI, protein-protein interaction.

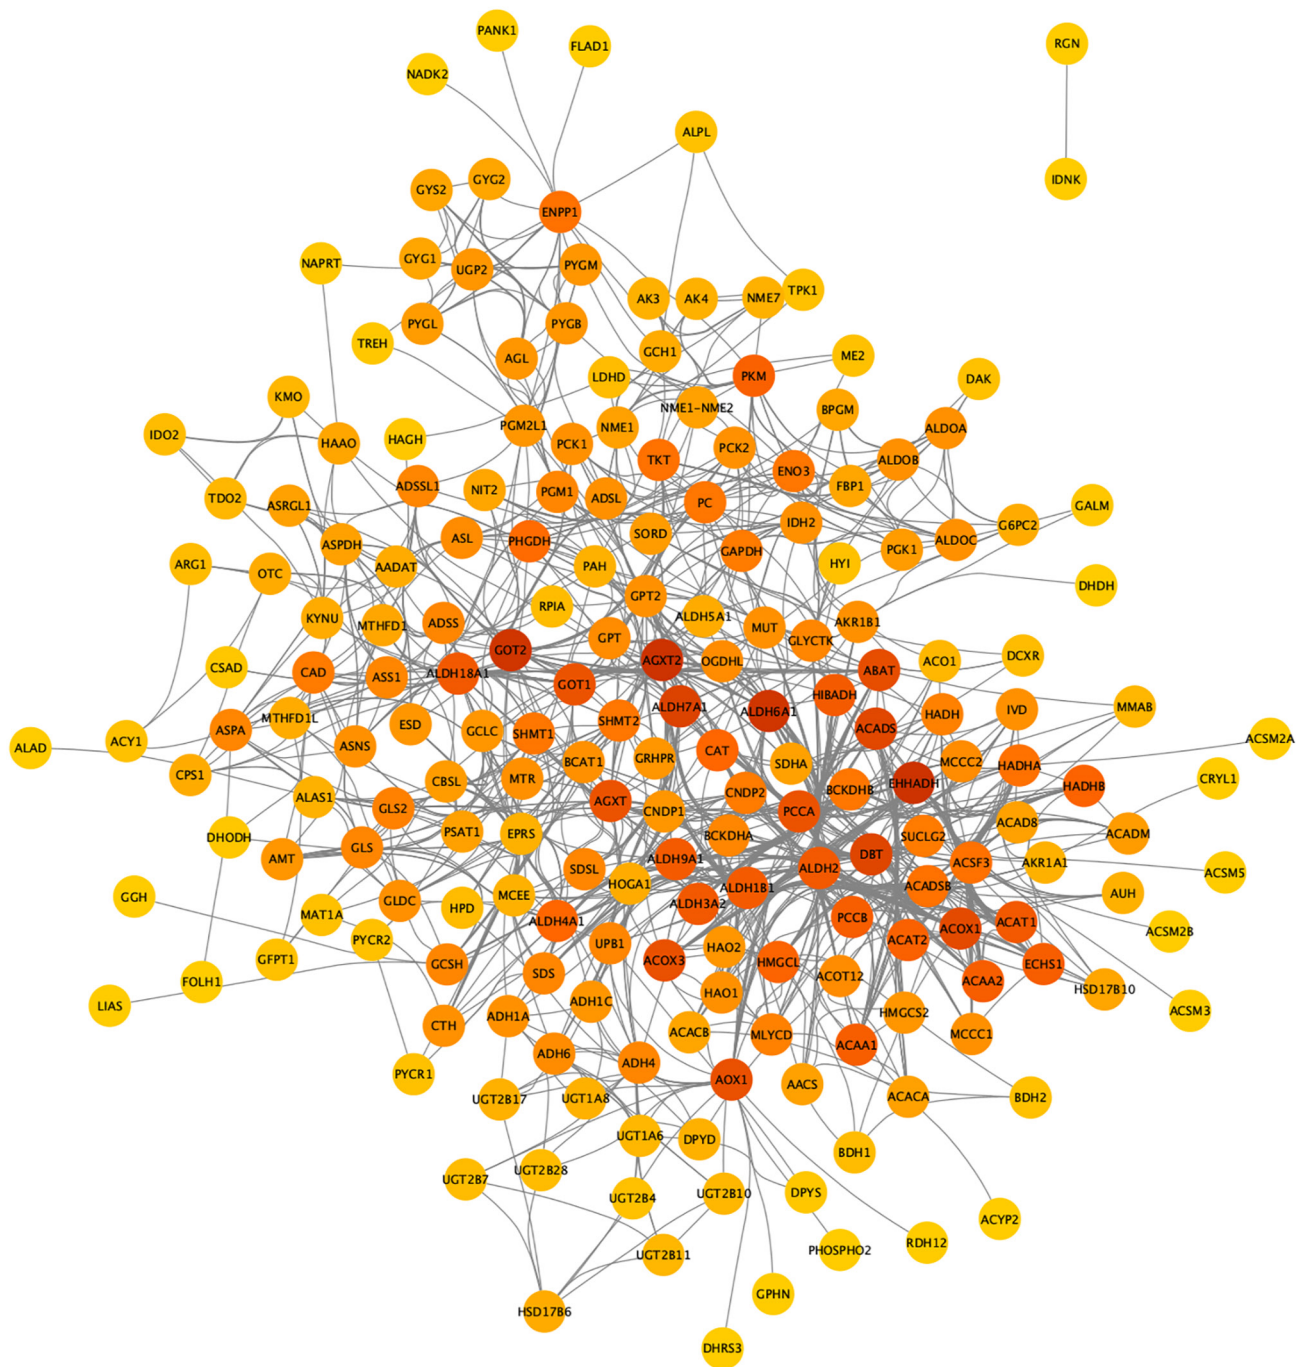

Supplement: Supplementary file 1 [file downloadSupplementary]
